# Supplementary material for: Structure–property relationship study of Nafion XL membrane for high-rate, long-lifespan, and all-climate vanadium flow batteries
Source: Royal Society of Chemistry journal article supplement (doi:10.1039/c7ra04996j), 2017-01-01
Supplement: c7ra04996j1.pdf [file c7ra04996j1.pdf]

## Electronic Supplementary Information

### **Structure-property relationship study of Nafion XL membrane for high-rate, long-lifespan, and all-climate vanadium flow batteries**

Lihong Yu,<sup>\*a</sup> Feng Lin,<sup>a</sup> Ling Xu<sup>a</sup> and Jingyu Xi<sup>\*b</sup>

<sup>a</sup> *School of Applied Chemistry and Biological Technology, Shenzhen Polytechnic, Shenzhen 518055, China. E-mail: yulihong@szptu.edu.cn*

<sup>b</sup> *Institute of Green Chemistry and Energy, Graduate School at Shenzhen, Tsinghua University, Shenzhen 518055, China. E-mail: xijy@tsinghua.edu.cn*

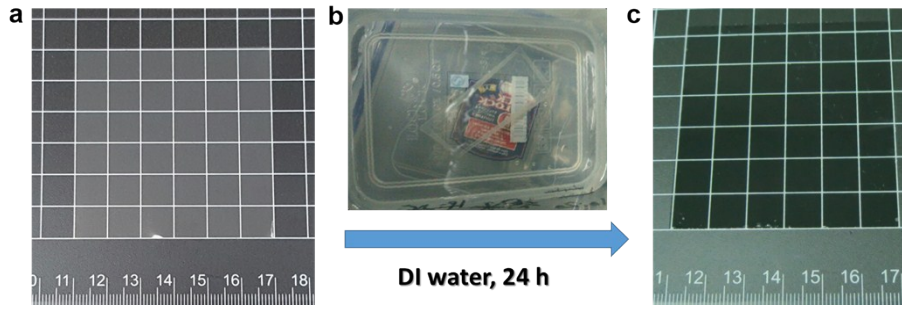

**Fig. S1.** Photographs of Nafion XL membranes: (a) as-received membrane; (b) immersed in DI water; (c) wet membrane.

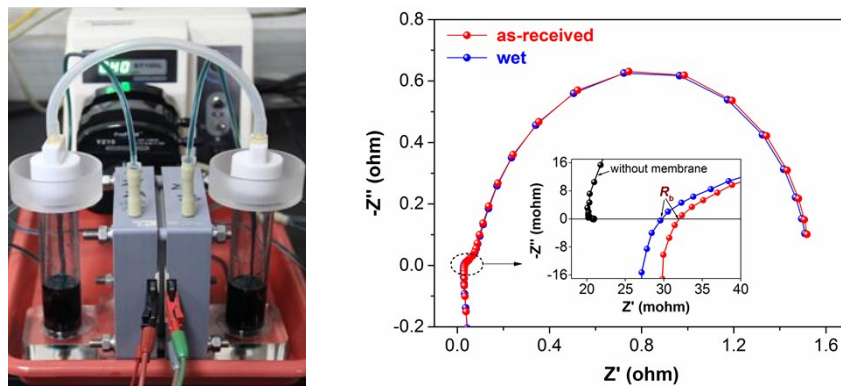

**Fig. S2.** Photograph of the VFB single-cell (left) and Nyquist plots of VFBs assembled with as-received and wet Nafion XL membranes (right).

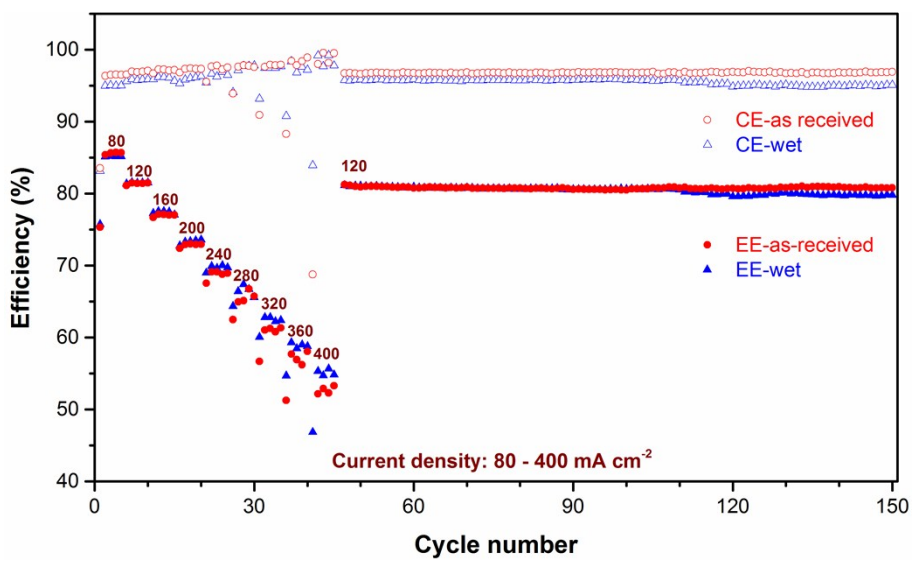

**Fig. S3.** Rate performance and cycling stability of VFBs assembled with as-received and wet Nafion XL membranes.
